# Cytosolic Alkalization and Cytosolic Calcium Oscillation in Arabidopsis Guard Cells Response to ABA and MeJA

Mohammad Mahbub Islam<sup>1</sup>, Mohammad Anowar Hossain<sup>1</sup>, Rayhanur Jannat<sup>1</sup>, Shintaro Munemasa<sup>1</sup>, Yoshimasa Nakamura<sup>1</sup>, Izumi C. Mori<sup>2</sup> and Yoshiyuki Murata<sup>1,\*</sup>

<sup>1</sup>Graduate School of Natural Science and Technology, Okayama University, 3-1-1 Tsushima-naka, Okayama 700-8530, Japan

<sup>2</sup>Research Institute for Bioresources, Okayama University, Kurashiki, Okayama 710-0046, Japan

\*Corresponding author: E-mail, muta@cc.okayama-u.ac.jp; Fax, +81-86-251-8388

(Received June 25, 2010; Accepted August 18, 2010)

**Abstract:** Absciscic acid (ABA)- and methyl jasmonate (MeJA)-induced stomatal closure are accompanied by cytosolic alkalization in guard cells. However, it remains to be clarified how the alkalization functions in not only ABA signaling but also MeJA. We investigated cytosolic alkalization in guard cells during ABA-, MeJA- and  $\text{Ca}^{2+}$ -induced stomatal closure of wild type, *abi1-1*, *abi2-1*, *ost1-2* and *coi1* using a pH-sensitive fluorescent dye, BCECF-AM. ABA induced cytosolic alkalization in guard cells of wild-type and *coi1* but not in *ost1-2* guard cells whereas MeJA elicited cytosolic alkalization in wild-type and *ost1-2* guard cells but not in *coi1*. Neither ABA nor MeJA induced cytosolic alkalization in *abi1-1* and *abi2-1* guard cells. Exogenous  $\text{Ca}^{2+}$  induced stomatal closure accompanied by cytosolic alkalization in guard cells of wild-type, *abi1-1*, *abi2-1*, *ost1-2* and *coi1* plants. An agent to acidify cytosol, butyrate, suppressed  $\text{Ca}^{2+}$ -induced cytosolic alkalization and ABA-, MeJA- and  $\text{Ca}^{2+}$ -induced cytosolic  $\text{Ca}^{2+}$  oscillation in wild-type guard cells to prevent stomatal closure. These results indicate that cytosolic alkalization and cytosolic  $\text{Ca}^{2+}$  oscillation coordinately function in ABA and MeJA signaling in Arabidopsis guard cells.

**Keywords:** Absciscic acid • *Arabidopsis thaliana* • Cytosolic calcium • Cytosolic pH • Guard cells • Methyl jasmonate.

**Abbreviations:** ABA, abscisic acid; BCECF-AM, 2',7'-bis-(2-carboxyethyl)-5,(6)-carboxyfluorescein acetoxymethyl ester;  $[\text{Ca}^{2+}]_{\text{cyt}}$  cytosolic calcium concentration; MeJA, methyl jasmonate;  $\text{pH}_{\text{cyt}}$  cytosolic pH; PP2Cs, protein phosphatases 2C; ROS, reactive oxygen species.

## Introduction

Guard cells, which form stomatal pores in leaf epidermis of higher plants, respond to numerous biotic and abiotic signaling stimuli (Schroeder et al. 2001, Hetherington and Woodward 2003, Melotto et al. 2006). Many studies have shown that ABA

and MeJA stimulate stomatal closure in many plant species (Irving et al. 1992, Blatt and Armstrong 1993, Gehring et al. 1997, Suhita et al. 2004, Saito et al. 2008, Islam et al. 2009, Islam et al. 2010).

Stomatal closure occurs with increment of cytosolic calcium concentration,  $[\text{Ca}^{2+}]_{\text{cyt}}$  and oscillation of  $[\text{Ca}^{2+}]_{\text{cyt}}$  in guard cells in response to ABA,  $\text{Ca}^{2+}$ ,  $\text{H}_2\text{O}_2$  and  $\text{CO}_2$  (Allen et al. 1999a, Allen et al. 2000, Pei et al. 2000, Allen et al. 2001, Mori et al. 2006, Young et al. 2006). Recently, it has been reported that MeJA-induced stomatal closure is accompanied by  $[\text{Ca}^{2+}]_{\text{cyt}}$  oscillation in guard cells (Islam et al. 2010). Biochemical and genetic analyses indicate that ABA and MeJA induce reactive oxygen species (ROS) production mediated by NAD(P)H oxidase (Kwak et al. 2003, Suhita et al. 2004) and that ROS elicits  $[\text{Ca}^{2+}]_{\text{cyt}}$  elevation required by ABA- and MeJA-induced stomatal closure in Arabidopsis (Pei et al. 2000, Murata et al. 2001, Munemasa et al. 2007). Elevation of  $[\text{Ca}^{2+}]_{\text{cyt}}$  activates S-type anion currents and inhibits inward  $\text{K}^+$  currents in the plasma membrane of guard cells to accelerate efflux of anion and  $\text{K}^+$  from cytosol to apoplast, which leads to stomatal closure (Schroeder and Hagiwara 1989, Allen et al. 1999a, Vahisalu et al. 2008).

Increment of cytosolic pH ( $\text{pH}_{\text{cyt}}$ ) (alkalization) in guard cells is a common phenomenon in both ABA- and MeJA-induced stomatal closure in Arabidopsis, *Pisum* and *Paphiopedilum* (Irving et al. 1992, Gehring et al. 1997, Suhita et al. 2004, Gonugunta et al. 2008). It has been reported that ABA elevates  $[\text{Ca}^{2+}]_{\text{cyt}}$  in accordance with increment of  $\text{pH}_{\text{cyt}}$  in *Paphiopedilum* guard cells (Irving et al. 1992), but to our knowledge, there is no report of interaction between MeJA-induced  $[\text{Ca}^{2+}]_{\text{cyt}}$  oscillation and cytosolic alkalization. The  $[\text{Ca}^{2+}]_{\text{cyt}}$  increment inactivates inward  $\text{K}^+$  currents, which is favorable to ABA-induced stomatal closure (Schroeder and Hagiwara 1989, McAinsh et al. 1990). Cytosolic alkalization also activates outward  $\text{K}^+$  currents and inactivates inward  $\text{K}^+$  currents to promote net efflux of  $\text{K}^+$  in *Vicia* guard cells (Blatt and Armstrong 1993). Grabov and Blatt (1997) showed that cytosolic acidification activates inward  $\text{K}^+$  currents but does not significantly

*Plant Cell Physiol.* 51(10): 1721–1730 (2010) doi:10.1093/pcp/pcq131, available online at www.pcp.oxfordjournals.org

© The Author 2010. Published by Oxford University Press on behalf of Japanese Society of Plant Physiologists.

All rights reserved. For permissions, please email: journals.permissions@oxfordjournals.org

change  $[Ca^{2+}]_{cyt}$ . These results indicate that changes in  $pH_{cyt}$  are closely involved in the modulation of ion mobilization to lead stomatal movement.

It has been demonstrated that  $H_2O_2$  induced stomatal closure with cytosolic alkalization in *Vicia* guard cells (Zhang et al. 2001). Suhita et al. (2004) concluded that alkalization is upstream of ROS production based on the time course of alkalization and ROS production in *Arabidopsis* guard cells. Recently, Gonugunta et al. (2008) suggest without results of  $[Ca^{2+}]_{cyt}$  in guard cells that  $[Ca^{2+}]_{cyt}$  elevation functions upstream of ABA-induced cytosolic alkalization to induce stomatal closure in *Pisum sativum*. It remains unclear whether cytosolic alkalization functions in not only ABA signal cascade but also MeJA signal cascade in guard cells.

Protein phosphatases type 2C (PP2Cs), ABI1 and ABI2 are known as negative regulators of ABA signaling and *abi1-1* and *abi2-1* mutation disrupt both ABA and MeJA signaling in *Arabidopsis* (Gosti et al. 1999, Merlot et al. 2001, Murata et al. 2001, Munemasa et al. 2007). OST1 is one of the ABA-activated protein kinases and *ost1* mutation impairs ABA-induced stomatal closure but not MeJA-induced stomatal closure (Mustilli et al. 2002, Suhita et al. 2004). COI1 is one of the F-box proteins and *coi1* mutation disrupts MeJA-induced stomatal closure but not ABA-induced stomatal closure (Munemasa et al. 2007). However, the effects of these mutations on cytosolic alkalization in ABA and MeJA signaling are still unclear.

In this study, we used protein phosphatase mutants *abi1-1* and *abi2-1*, protein kinase mutant *ost1-2* and F-box protein mutant *coi1* in order to elucidate the role of guard cell  $Ca^{2+}_{cyt}$  in the modulation of guard cell  $pH_{cyt}$  induced by ABA, MeJA and  $Ca^{2+}$ . We examined (i) ABA- and MeJA-induced cytosolic alkalization in guard cells of *Arabidopsis* mutants, (ii)  $Ca^{2+}$ -induced stomatal closure and cytosolic alkalization and  $[Ca^{2+}]_{cyt}$  oscillation in guard cells and (iii) the effect of butyrate, a cytosol-acidifying agent, on  $Ca^{2+}$ -induced stomatal closure, cytosolic alkalization and ABA-, MeJA- and  $Ca^{2+}$ -induced  $[Ca^{2+}]_{cyt}$  oscillation in guard cells. Based on our findings, we propose an interaction of cytosolic alkalization and  $[Ca^{2+}]_{cyt}$  oscillation on ABA signaling and MeJA signaling in *Arabidopsis* guard cells.

## Results

### ABA- and MeJA-induced cytosolic alkalization in *Arabidopsis* guard cells

ABA and MeJA increase  $pH_{cyt}$  in guard cells to induce stomatal closure (Irving et al. 1992, Gehring et al. 1997, Suhita et al. 2004, Gonugunta et al. 2008). In this study, we analyzed ABA- or MeJA-induced cytosolic alkalization in guard cells of wild-type, *abi1-1*, *abi2-1*, *ost1-2* and *coi1* plants using a pH-sensitive fluorescent dye, 2',7'-bis-(2-carboxyethyl)-5,(6)-carboxyfluorescein acetoxymethyl ester (BCECF-AM) in order to make it clear where cytosolic alkalization functions in ABA and MeJA signaling of guard cells.

As shown in Fig. 1A, 10  $\mu$ M ABA ( $P < 0.008$ ) and 10  $\mu$ M MeJA ( $P < 0.004$ ) increased BCECF fluorescence intensity in wild-type [Landsberg (Ler)] guard cells. This result indicates that ABA and MeJA induce cytosolic alkalization, which is similar to a previous report (Suhita et al. 2004). ABA did not induce cytosolic alkalization ( $P > 0.09$ ) but MeJA induced cytosolic alkalization ( $P < 0.007$ ) in *ost1-2* guard cells. Neither ABA nor MeJA changed  $pH_{cyt}$  in *abi1-1* (ABA:  $P > 0.06$ ; MeJA:  $P > 0.53$ ) and *abi2-1* (ABA:  $P > 0.92$ ; MeJA:  $P > 0.06$ ) guard cells. These results are consistent with ABA- and MeJA-induced stomatal closure phenotype in these mutants (Murata et al. 2001, Suhita et al. 2004, Munemasa et al. 2007, data not shown).

Like Ler wild-type plants, application of 10  $\mu$ M ABA ( $P < 0.005$ ) and 10  $\mu$ M MeJA ( $P < 0.04$ ) increased  $pH_{cyt}$  in wild-type [Columbia-0 (Col-0)] guard cells (Fig. 1B), which does not conflict with the results of Suhita et al. (2004). ABA ( $P < 0.009$ ) significantly increased  $pH_{cyt}$  in *coi1* whereas MeJA ( $P > 0.19$ ) failed to increase  $pH_{cyt}$  in *coi1* guard cells (Fig. 1B). These results are consistent with the result that *coi1* mutation impairs MeJA-induced stomatal closure but not ABA-induced stomatal closure (Munemasa et al. 2007). Time-course experiments show that  $pH_{cyt}$  in guard cells was elevated by ABA and MeJA with incubation time and reached its plateau level at 20 min (Fig. 1C). Fig. 1D shows representative fluorescence images of control epidermal tissue and ABA-treated and MeJA-treated tissues. There is no significant difference between ABA-induced alkalization and MeJA-induced cytosolic alkalization in guard cells ( $P > 0.22$ ). These results indicate that MeJA-induced stomatal closure as well as ABA-induced stomata closure requires cytosolic alkalization.

### Extracellular $Ca^{2+}$ -induced stomatal closure in ABA- or MeJA-insensitive mutants

Many previous studies illustrated that exogenous  $Ca^{2+}$  induced stomatal closure in *Commelina*, *Vicia*, *Pisum* and *Arabidopsis* (Schwartz et al. 1988, Allen et al. 2000, Li et al. 2004, Gonugunta et al. 2008, Islam et al. 2009, Islam et al. 2010). Exogenous  $Ca^{2+}$  elicited  $[Ca^{2+}]_{cyt}$  elevation, resulting in stomatal closure in *Arabidopsis* guard cells (Allen et al. 1999a). The  $Ca^{2+}$  chelator EGTA prevents exogenous  $Ca^{2+}$ -induced stomatal closure (Schwartz 1985, Gonugunta et al. 2008). We examined exogenous  $Ca^{2+}$ -induced stomatal closure in wild-type plants (Ler and Col-0) and *Arabidopsis* mutant plants.

As shown in Fig. 2A, exogenous  $Ca^{2+}$  induced stomatal closure in a dose-dependent manner in *abi1-1*, *abi2-1*, *ost1-2* mutants and wild-type (Ler) plant. Exogenous  $Ca^{2+}$  at 2.5 mM significantly decreased stomatal apertures in wild type ( $P < 0.009$ ) and *abi1-1* ( $P < 0.006$ ), *abi2-1* ( $P < 0.0002$ ) and *ost1-2* ( $P < 0.0001$ ) mutants, which is similar to previous reports (Allen et al. 1999a, Mustilli et al. 2002).

Application of  $Ca^{2+}$  induced stomatal closure in wild-type (Col-0) and *coi1* mutant plants (Fig. 2B). Exogenous  $Ca^{2+}$  at 2.5 mM induced stomatal closure in wild type ( $P < 0.007$ ) and *coi1* ( $P < 0.002$ ). Fig. 2A, B indicates that  $Ca^{2+}$  promotes stomatal closure in these mutants as well as in wild type. These results

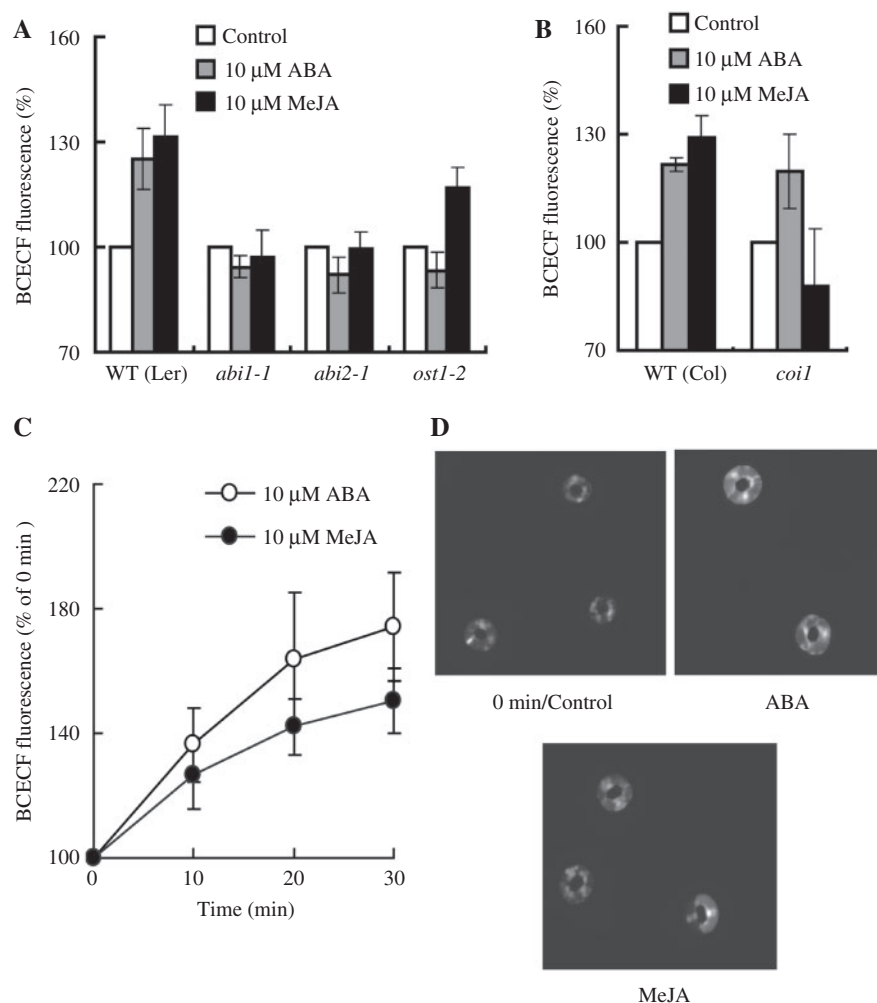

**Fig. 1** ABA- and MeJA-induced cytosolic alkalization in Arabidopsis guard cells. (A) Effects of ABA ( $n=3$ ) and MeJA ( $n=3$ ) on BCECF fluorescence in wild-type (Ler), *abi1-1*, *abi2-1* and *ost1-2* mutant guard cells. (B) Effects of ABA ( $n=3$ ) and MeJA ( $n=3$ ) on BCECF fluorescence in wild-type (Col-0) and *coi1* mutant guard cells. (C) Time course of BCECF fluorescence in wild-type guard cells in response to ABA (open circle) and MeJA (closed circle) ( $n=3$ ). The vertical scale represents the percentage of BCECF fluorescence when fluorescence intensities of ABA- or MeJA-treated cells are normalized to the control value taken as 100% for each experiment. Data were obtained from at least 50 guard cells. Error bars represent SD. (D) Representative fluorescence images of epidermal tissues at 0 min for control and 20 min after treatment with ABA and MeJA.

suggest that the ABA and MeJA signaling cascade downstream of [Ca<sup>2+</sup>]<sub>cyt</sub> elevation is not impaired in *abi1-1*, *abi2-1*, *ost1-2* and *coi1* mutant plants.

### Ca<sup>2+</sup>-induced cytosolic alkalization in Arabidopsis guard cells

ABA- and MeJA-induced stomatal closure requires not only [Ca<sup>2+</sup>]<sub>cyt</sub> elevation but also cytosolic alkalization in guard cells of Arabidopsis, *Paphiopedilum* and *Pisum* (Irving et al. 1992, Allen et al. 1999a, Suhita et al. 2004, Mori et al. 2006, Gonugunta et al. 2008). However, it is unclear whether exogenous Ca<sup>2+</sup> evokes cytosolic alkalization in Arabidopsis guard cells. Thus, we investigated cytosolic alkalization in guard cells treated with Ca<sup>2+</sup> using BCECF-AM.

As shown in **Fig. 2C, D**, external 2.5 mM Ca<sup>2+</sup> increased pH<sub>cyt</sub> in wild-type (Ler:  $P<0.02$ ; Col-0:  $P<0.0003$ ) guard cells.

External Ca<sup>2+</sup> increased pH<sub>cyt</sub> in *abi1-1* ( $P<0.05$ ), *abi2-1* ( $P<0.01$ ), *ost1-2* ( $P<0.005$ ) and *coi1* ( $P<0.006$ ) guard cells. In **Fig. 2A, B**, Ca<sup>2+</sup> induced stomatal closure in both wild type (Ler and Col-0) and these mutants. These results indicate that external Ca<sup>2+</sup> induces stomatal closure with cytosolic alkalization in Arabidopsis guard cells.

### Effects of butyrate on Ca<sup>2+</sup>-induced stomatal closure and Ca<sup>2+</sup>-induced cytosolic alkalization

To investigate whether Ca<sup>2+</sup>-induced stomatal closure requires cytosolic alkalization, we used an intracellular acidifying agent, sodium butyrate, to inhibit cytosolic alkalization in guard cells (Leipziger et al. 2000, Stewart et al. 2001). Exogenous Ca<sup>2+</sup> at 0.5, 1.0 and 2.5 mM (0.5 mM,  $P<0.03$ ; 1.0 mM,  $P<0.05$ ; 2.5 mM,  $P<0.002$ ) induced stomatal closure in the absence of butyrate but failed to induce stomatal closure in the presence of butyrate

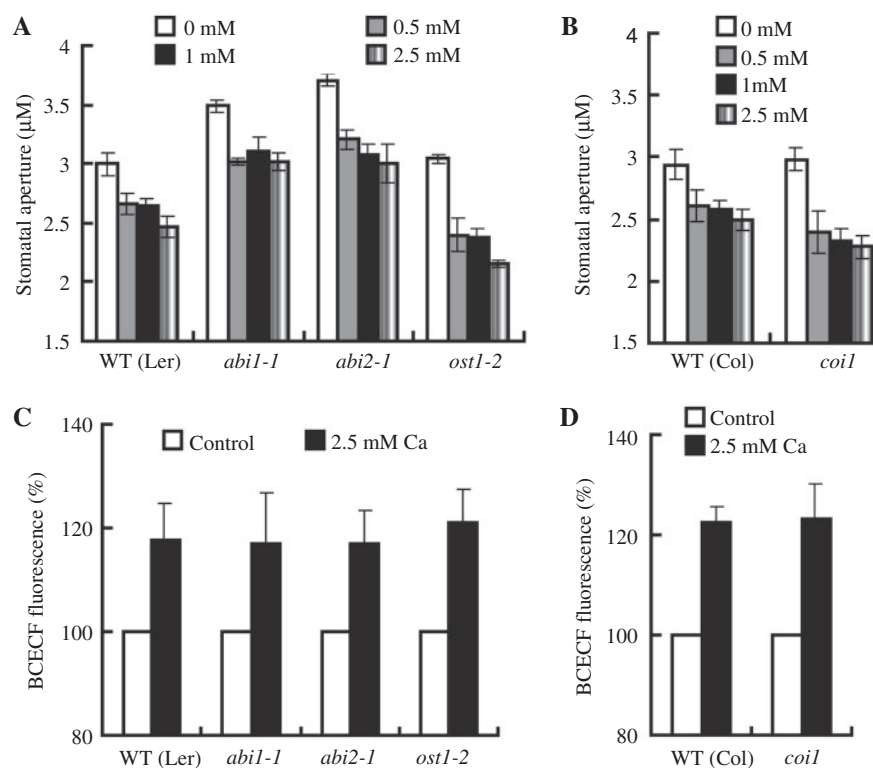

**Fig. 2** Exogenous  $\text{Ca}^{2+}$ -induced stomatal closure and cytosolic alkalization in Arabidopsis guard cells. (A) Exogenous  $\text{Ca}^{2+}$  ( $n=3$ ) reduces stomatal aperture in wild type (Ler), *abi1-1*, *abi2-1* and *ost1-2* mutants. (B) Exogenous  $\text{Ca}^{2+}$  ( $n=3$ ) reduces stomatal aperture in wild type (Col-0) and *coi1* mutant. Data were obtained from 60 total stomata per bar. (C) Effects of  $\text{Ca}^{2+}$  ( $n=3$ ) on BCECF fluorescence in wild-type (Ler), *abi1-1*, *abi2-1* and *ost1-2* mutant guard cells. (D) Effects of  $\text{Ca}^{2+}$  ( $n=3$ ) on BCECF fluorescence in wild-type (Col-0) and *coi1* mutant guard cells. The vertical scale represents the percentage of BCECF fluorescence when fluorescent intensities of  $\text{Ca}^{2+}$ -treated cells are normalized to the control value taken as 100% for each experiment. Data were obtained from at least 50 guard cells. Error bars represent SD.

(0.5 mM,  $P>0.07$ ; 1.0 mM,  $P>0.13$ ; 2.5 mM,  $P>0.10$ ) in wild-type plants (Fig. 3A), whereas butyrate did not significantly affect the stomatal apertures of  $\text{Ca}^{2+}$ -untreated wild-type plants ( $P>0.09$ ).

We also assessed the effects of butyrate on  $\text{Ca}^{2+}$ -induced changes in  $\text{pH}_{\text{cyt}}$  in guard cells. Wild-type guard cells showed cytosolic alkalization in response to exogenous  $\text{Ca}^{2+}$  ( $P<0.01$ ) whereas butyrate inhibited cytosolic alkalization in wild-type guard cells ( $P>0.06$ ) (Fig. 3B). Suhita et al. (2004) demonstrated that butyrate prevents ABA- and MeJA-induced cytosolic alkalization along with stomatal closure in wild-type plants. Taken together with the results in Fig. 3A, these results suggested that ABA-, MeJA- and  $\text{Ca}^{2+}$ -induced stomatal closure is also mediated by cytosolic alkalization in guard cells and that cytosolic alkalization is involved in  $\text{Ca}^{2+}$ -dependent pathway in ABA and MeJA signaling in Arabidopsis guard cells.

### Effect of butyrate on $\text{Ca}^{2+}$ -, ABA- and MeJA-induced $[\text{Ca}^{2+}]_{\text{cyt}}$ oscillation in guard cells

Application of ABA, MeJA and  $\text{Ca}^{2+}$  induce  $[\text{Ca}^{2+}]_{\text{cyt}}$  oscillations in Arabidopsis guard cells, leading to stomatal closure (Allen et al. 2000, Allen et al. 2001, Allen et al. 2002, Islam et al. 2010).

We examined the effects of butyrate on  $\text{Ca}^{2+}$ -, ABA- and MeJA-induced  $[\text{Ca}^{2+}]_{\text{cyt}}$  oscillations in guard cells using the Yellow Cameleon (YC) technique.

Exogenous  $\text{Ca}^{2+}$  at 2.5 mM elicited  $[\text{Ca}^{2+}]_{\text{cyt}}$  oscillations (three or more oscillation, 83%; one or two oscillations 17%,  $n=12$ ) in wild-type guard cells (Fig. 4A, D). Application of butyrate suppressed  $\text{Ca}^{2+}$ -induced  $[\text{Ca}^{2+}]_{\text{cyt}}$  oscillations (three or more oscillations, 20%; one or two oscillations, 35%; no oscillation, 45%;  $n=20$ ) in wild-type guard cells (Fig. 4B, D), whereas butyrate did not induce  $[\text{Ca}^{2+}]_{\text{cyt}}$  oscillations (Fig. 4C, D). There is a significant difference in frequency of oscillation between untreated cells and butyrate-treated cells ( $\chi^2=47.25$ ,  $P<0.001$ ). These results are consistent with the result that butyrate inhibited  $\text{Ca}^{2+}$ -induced stomatal closure in the wild type (Fig. 3A).

Application of 10  $\mu\text{M}$  ABA (Fig. 5A, E) and 10  $\mu\text{M}$  MeJA (Fig. 5C, F) elicited  $[\text{Ca}^{2+}]_{\text{cyt}}$  oscillations (three or more oscillation 38%; one or two oscillations 41%; no oscillation 21%,  $n=34$  for ABA and three or more oscillation, 31%; one or two oscillations, 50%; no oscillation 19%,  $n=26$  for MeJA) in wild-type guard cells, which is consistent with ABA- and MeJA-induced stomatal closure (Allen et al. 2000, Islam et al. 2010).



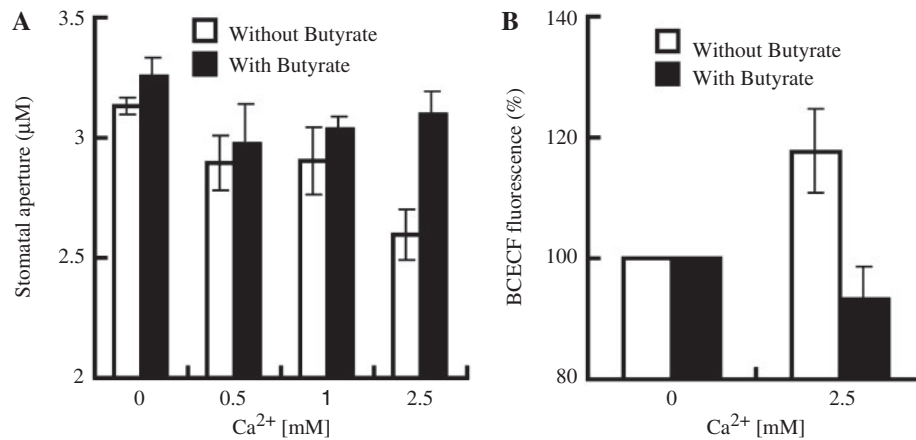

**Fig. 3** Inhibition of Ca<sup>2+</sup>-induced stomatal closure and cytosolic alkalization in guard cells by an acidifying agent, butyrate, in wild type (Ler). (A) Rosette leaves of wild-type plants were incubated for 2 h in light. Light-treated leaves were further treated with sodium butyrate (0.5 mM) under light for 2 h. Then, the leaves were treated with Ca<sup>2+</sup> under light for 2 h. Data were obtained from 60 total stomata per bar. (B) Leaf epidermal tissues of wild-type plants were incubated for 3 h in light. Light-treated tissues were treated with 20 μM BCECF-AM for 30 min in the dark. Epidermal peels were rinsed with incubation buffer and then 0.5 mM sodium butyrate was added for 20 min. The epidermal tissues were treated for 20 min with 2.5 mM Ca<sup>2+</sup> or water as control treatment. The vertical scale represents the percentage of BCECF fluorescence when fluorescent intensities of Ca<sup>2+</sup> treated cells are normalized to the control value taken as 100% for each experiment. Data were obtained from at least 50 guard cells. Error bars represent SD.

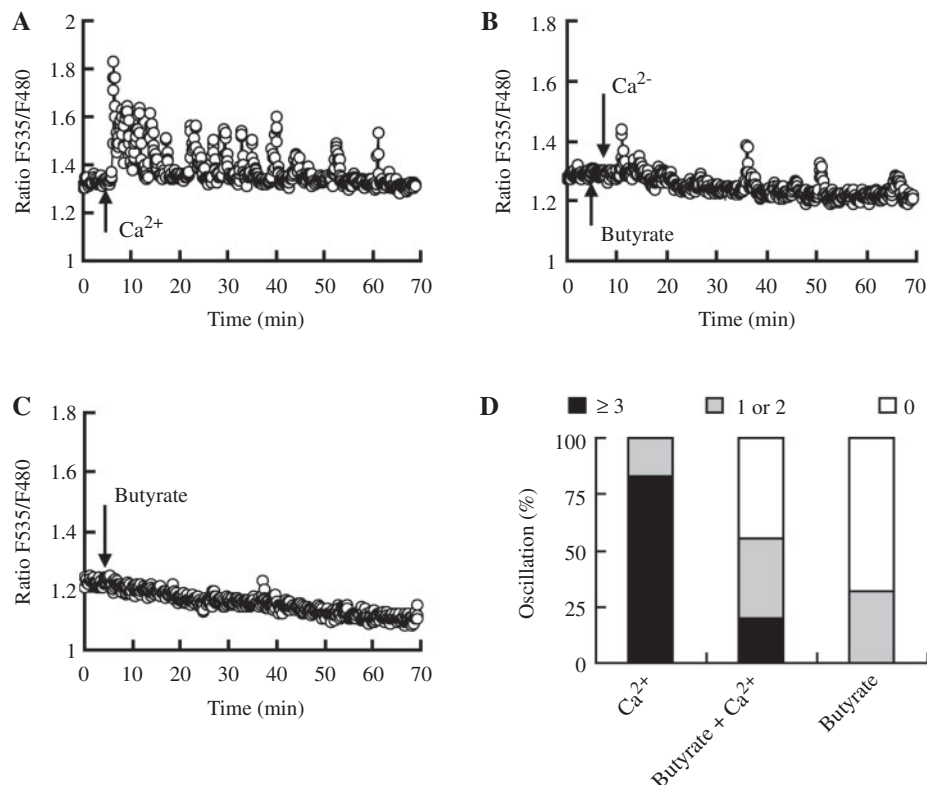

**Fig. 4** Effects of 0.5 mM butyrate on Ca<sup>2+</sup>-induced [Ca<sup>2+</sup>]<sub>cyt</sub> oscillations in wild-type guard cells. The fluorescence emission ratio (535/480 nm) was measured in guard cells expressing yellow cameleon 3.6 (YC 3.6). (A) Ca<sup>2+</sup>-induced [Ca<sup>2+</sup>]<sub>cyt</sub> oscillations in wild-type guard cells untreated with butyrate. (B) Ca<sup>2+</sup>-induced [Ca<sup>2+</sup>]<sub>cyt</sub> oscillations in wild-type guard cells treated with butyrate. (C) [Ca<sup>2+</sup>]<sub>cyt</sub> oscillations in wild-type guard cells treated with butyrate. (D) Frequencies of [Ca<sup>2+</sup>]<sub>cyt</sub> oscillation in guard cells. [Ca<sup>2+</sup>]<sub>cyt</sub> transients were counted when changes in [Ca<sup>2+</sup>]<sub>cyt</sub> ratios were ≥ 0.1 units.

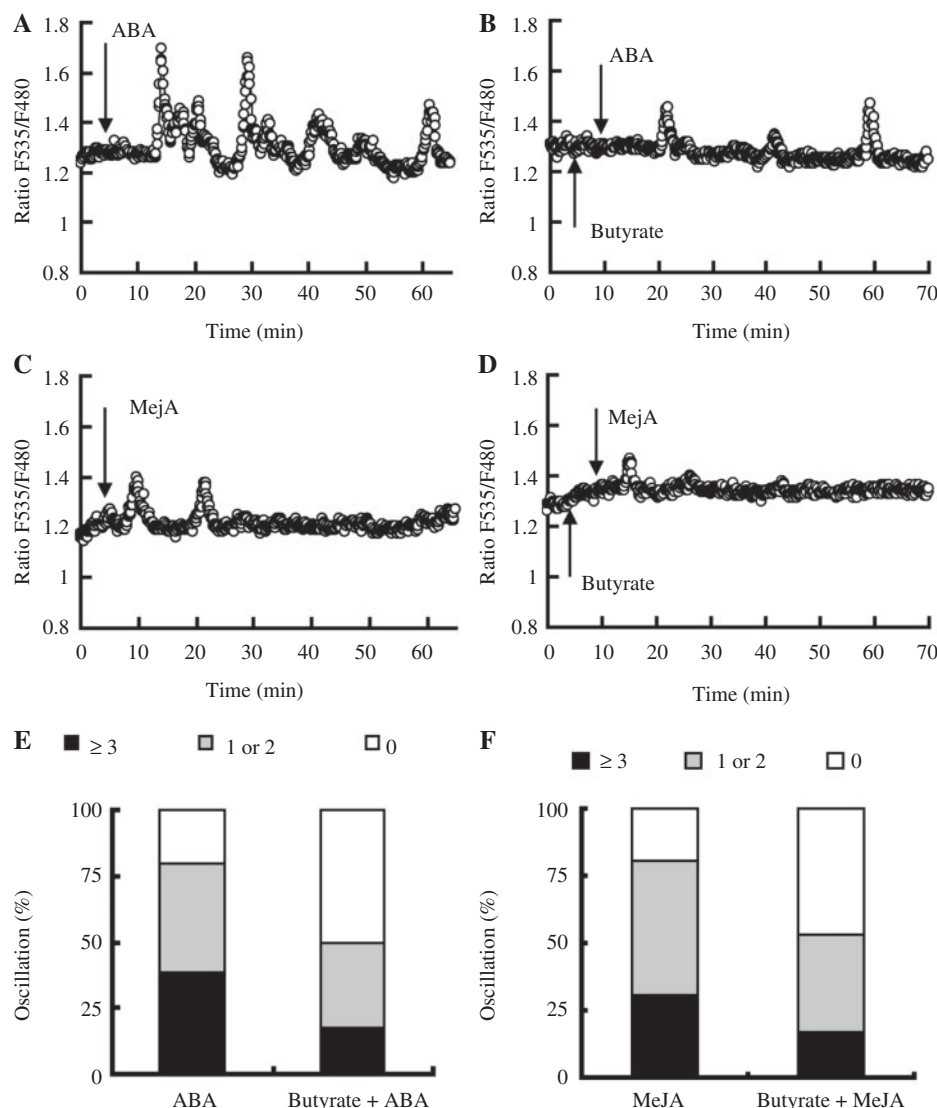

**Fig. 5** Effects of 0.5 mM butyrate on ABA- and MeJA-induced  $[Ca^{2+}]_{cyt}$  oscillations in wild-type guard cells. Fluorescence emission ratio (535/480 nm) was measured in guard cells expressing yellow cameleon 3.6 (YC 3.6). (A) ABA-induced  $[Ca^{2+}]_{cyt}$  oscillations in wild-type guard cells untreated with butyrate. (B) ABA-induced  $[Ca^{2+}]_{cyt}$  oscillations in wild-type guard cells treated with butyrate. (C) MeJA-induced  $[Ca^{2+}]_{cyt}$  oscillations in wild-type guard cells untreated with butyrate. (D) MeJA-induced  $[Ca^{2+}]_{cyt}$  oscillations in wild-type guard cells treated with butyrate. (E) Frequencies of ABA-induced  $[Ca^{2+}]_{cyt}$  oscillation in guard cells in the absence or presence of butyrate. (F) Frequencies of MeJA-induced  $[Ca^{2+}]_{cyt}$  oscillation in guard cells in the absence or presence of butyrate.  $[Ca^{2+}]_{cyt}$  transients were counted when changes in  $[Ca^{2+}]_{cyt}$  ratios were  $\geq 0.1$  units.

Application of butyrate suppressed ABA- and MeJA-induced  $[Ca^{2+}]_{cyt}$  oscillations (three or more oscillations, 18%; one or two oscillations, 50%; no oscillation, 34%;  $n=34$  for ABA and three or more oscillations, 16%; one or two oscillations, 37%; no oscillation, 47%;  $n=30$  for MeJA) in wild-type guard cells (Fig. 5B, E and D, F). There is a significant difference in the frequency of oscillation between butyrate-untreated cells and butyrate-treated cells ( $\chi^2=18.36$ ,  $P<0.001$  for ABA and  $\chi^2=16.36$ ,  $P<0.001$  for MeJA). These results are consistent with the results that butyrate inhibited ABA- and MeJA-induced stomatal closure in the wild type (Suhita et al. 2004).

## Discussion

ABA activates vacuolar  $H^+$ -ATPase activity in *Mesembryanthemum*, resulting in cytosolic alkalization (increment of  $pH_{cyt}$ ) (Barkla et al. 1999). Both ABA and MeJA stimulate ROS production in wild-type guard cells to increase  $[Ca^{2+}]_{cyt}$  via activation of plasma membrane non-selective cation channels during stomatal closure in Arabidopsis (Pei et al. 2000, Munemasa et al. 2007). In guard cells,  $[Ca^{2+}]_{cyt}$  and  $pH_{cyt}$  function as second messengers to activate anion efflux and  $K^+$  to lead stomatal closure (Schroeder and Hagiwara 1989, Blatt and Armstrong 1993).

In this study, we investigated signal interaction between [Ca<sup>2+</sup>]<sub>cyt</sub> elevation and cytosolic alkalization during ABA- and MeJA-induced stomatal closure in Arabidopsis.

### Cytosolic alkalization in guard cells during ABA- and MeJA-induced stomatal closure

Previous studies have reported that stomatal closure is triggered by elevating guard cell [Ca<sup>2+</sup>]<sub>cyt</sub> and pH<sub>cyt</sub> in response to ABA or MeJA in Arabidopsis and *Pisum* (Suhita et al. 2004, Gonugunta et al. 2008). Pharmacological and genetic experiments indicate that ROS is one of common signal components for ABA- and MeJA-induced stomatal closure (Munemasa et al. 2007). Protein kinase OST1 is involved in ABA signaling in guard cells and the *ost1* mutation impairs ABA-induced stomatal closure but not MeJA-induced stomatal closure (Suhita et al. 2004). F-box protein COI1 is a jasmonate receptor and the *coi1* mutation disrupts MeJA signaling but not ABA signaling in guard cells (Munemasa et al. 2007, Yan et al. 2009). The PP2C ABI1 interacts with ABA receptors RCARs and PYR/PYL in ABA signaling (Ma et al. 2009, Park et al. 2009) but interestingly the *abi1* mutation impairs both ABA- and MeJA-induced stomatal closure (Murata et al. 2001, Munemasa et al. 2007).

Present results confirm previous work that *abi1-1* mutation impaired both ABA- and MeJA-induced guard cell cytosolic alkalization and *ost1-2* mutation impaired only ABA-induced guard cell cytosolic alkalization (Fig. 1A), which is consistent with stomatal movement in response to ABA or MeJA in *abi1-1* and *ost1-2* mutants (Suhita et al. 2004). Unlike ABA, MeJA failed to increase pH<sub>cyt</sub> in *coi1* mutants (Fig. 1B), which is also consistent with the results that *coi1* mutation impairs MeJA-induced stomatal closure but not ABA-induced stomatal closure (Munemasa et al. 2007). These results also indicate that cytosolic alkalization is required by ABA- and MeJA-induced stomatal closure and a common signal component of ABA and MeJA signaling.

It has been shown that the *abi2-1* mutation disrupts downstream of ROS production in the ABA and MeJA signal cascade of guard cells (Murata et al. 2001, Munemasa et al. 2007). Application of exogenous H<sub>2</sub>O<sub>2</sub> induces cytosolic alkalization in guard cells to lead stomatal closure in *Vicia faba* (Zhang et al. 2001). In this study, the *abi2-1* mutation also impairs ABA- and MeJA-induced pH<sub>cyt</sub> elevation in guard cells (Fig. 1A). Taken together, these results indicate that increment of pH<sub>cyt</sub> (cytosolic alkalization) functions downstream of ROS production in ABA signaling and MeJA signaling of guard cells, which is consistent with the recent finding of Gonugunta et al. (2008).

Suhita et al. (2004) have concluded that alkalization is upstream of ROS production based on the time course of alkalization and ROS production, which is in conflict with other results (Zhang et al. 2001, Gonugunta et al. 2008). The time-course experiments probably missed undetectable earlier ROS production in early response to ABA and MeJA because the reaction rate of DCF formation is slower than that of change in BCECF fluorescence, i.e. ROS detection using H<sub>2</sub>DCF requires peroxidase mediation before formation of fluorescent DCF

and pH measurement using BCECF is based on protonation/deprotonation. The reaction rate of the former could be slower than that of the latter, suggesting that the time-course experiment could not detect earlier ROS production followed by cytosolic alkalization in guard cells.

### Exogenous Ca<sup>2+</sup>-induced stomatal closure requires cytosolic alkalization and [Ca<sup>2+</sup>]<sub>cyt</sub> oscillation in guard cells

Exogenous Ca<sup>2+</sup> as well as ABA and MeJA induce [Ca<sup>2+</sup>]<sub>cyt</sub> elevation and elicit [Ca<sup>2+</sup>]<sub>cyt</sub> oscillation in guard cells, resulting in stomatal closure (Allen et al. 2000, Allen et al. 2001, Allen et al. 2002, Pei et al. 2000, Munemasa et al. 2007, Islam et al. 2010). In this study, exogenous Ca<sup>2+</sup> also elicited [Ca<sup>2+</sup>]<sub>cyt</sub> oscillation (Fig. 4A), which is consistent with stomatal closure (Fig. 2A, B). We also investigated change in pH<sub>cyt</sub> in wild type, *abi1-1*, *abi2-1*, *ost1-2* and *coi1* in response to exogenous Ca<sup>2+</sup>.

The present study shows that application of Ca<sup>2+</sup> induces cytosolic alkalization in *abi1-1*, *abi2-1*, *ost1-2* and *coi1* guard cells as well as wild-type guard cells (Fig. 2C, D), which is consistent with stomatal phenotype in these mutants in response to exogenous Ca<sup>2+</sup> (Fig. 2A, B). In *Pisum*, changes in [Ca<sup>2+</sup>]<sub>cyt</sub> are involved in changes in pH<sub>cyt</sub> in guard cells during ABA-induced stomatal closure (Gonugunta et al. 2008). These results indicate that [Ca<sup>2+</sup>]<sub>cyt</sub> elevation is accompanied by cytosolic alkalization in guard cells, resulting in stomatal closure and suggest that cytosolic alkalization functions downstream of [Ca<sup>2+</sup>]<sub>cyt</sub> elevation in Ca<sup>2+</sup> signaling in guard cells.

Both ABA and MeJA cause stomatal closure following ROS production, activation of plasma membrane I<sub>Ca</sub> currents by ROS, [Ca<sup>2+</sup>]<sub>cyt</sub> oscillation (elevation), which activate anion channels and outward K<sup>+</sup> channels and inactivate inward K<sup>+</sup> channels. Therefore, it is suggested that a Ca<sup>2+</sup>-dependent pathway contributes to ABA- and MeJA-induced stomatal closure (McAinsh et al. 1990, Pei et al. 2000, Murata et al. 2001, Evans 2003, Mori et al. 2006, Munemasa et al. 2007, Saito et al. 2008, Islam et al. 2010). On the other hand, it is also suggested that the Ca<sup>2+</sup>-independent pathway mediates ABA-induced stomatal closure (Gilroy et al. 1991, Allan et al. 1994). In addition, exogenous Ca<sup>2+</sup> activates anion currents and inhibits inward K<sup>+</sup> currents, which are favorable to stomatal closure (Schroeder and Hagiwara 1989, Grabov and Blatt 1999, Mori et al. 2006). This present study indicates that cytosolic alkalization is involved in a Ca<sup>2+</sup>-dependent pathway leading to stomatal closure.

### Interaction between cytosolic alkalization and [Ca<sup>2+</sup>]<sub>cyt</sub> oscillation on stomatal closure

We examined effects of an intracellular acidifying agent, sodium butyrate, on Ca<sup>2+</sup>-induced stomatal closure and Ca<sup>2+</sup>-induced [Ca<sup>2+</sup>]<sub>cyt</sub> oscillation. Butyrate inhibited ABA-, MeJA- and Ca<sup>2+</sup>-induced stomatal closure and cytosolic alkalization (Fig. 3A, B; Suhita et al. 2004, Gonugunta et al. 2008), which also indicates that Ca<sup>2+</sup>-induced stomatal closure requires cytosolic alkalization in guard cells and that [Ca<sup>2+</sup>]<sub>cyt</sub> elevation is an earlier

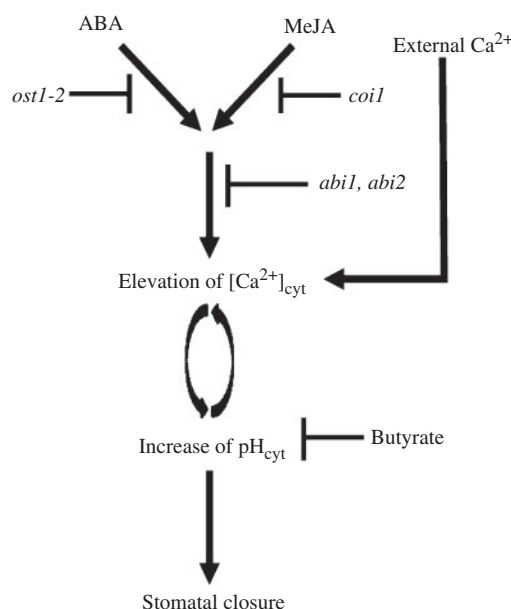

**Fig. 6** Simplified model for ABA- and MeJA-induced stomatal closure. Cytosolic alkalization is a downstream signal component of  $[Ca^{2+}]_{cyt}$  elevation and feedback-regulates  $[Ca^{2+}]_{cyt}$  oscillation in ABA and MeJA signaling of Arabidopsis guard cells.

essential signaling component to increase  $pH_{cyt}$  in response to ABA, MeJA and  $Ca^{2+}$  in Arabidopsis guard cells. The present study shows that butyrate suppresses  $Ca^{2+}$ , ABA- and MeJA-induced  $[Ca^{2+}]_{cyt}$  oscillation (Figs. 4, 5), which suggests that cytosolic alkalization feedback-regulates  $[Ca^{2+}]_{cyt}$  oscillation.

Intracellular pH is crucial to various cellular functions and intracellular alkalization is associated with an increase in cytosolic calcium in animal cells (Ilino et al. 1994, Alfonso et al. 2000). ABA activates vacuolar  $H^{+}$ -ATPase (V-ATPase) activity in *Mesembryanthemum* (Barkla et al. 1999) and elicits  $[Ca^{2+}]_{cyt}$  elevation and  $[Ca^{2+}]_{cyt}$  oscillation (Allen et al. 1999b, Allen et al. 2000, Murata et al. 2001, Mori et al. 2006, Islam et al. 2010), suggesting that  $pH_{cyt}$  is closely related to  $[Ca^{2+}]_{cyt}$  in plant cells.

In conclusion, cytosolic alkalization is elicited following  $[Ca^{2+}]_{cyt}$  elevation and feedback-regulates  $[Ca^{2+}]_{cyt}$  oscillation in ABA and MeJA signaling of Arabidopsis guard cells (Fig. 6).

## Materials and Methods

### Plant materials and growth conditions

In this study, we used *Arabidopsis thaliana* plants both Landsberg and Columbia-0 ecotypes as the wild type. Arabidopsis *abi1-1*, *abi2-1*, *ost1-2* (Landsberg accession) and *coi1* (Columbia accession) mutants were grown in plastic pots filled with a homogenized mixture of 70% (v/v) vermiculite (Asahi-kogyo, Okayama, Japan) and 30% (v/v) Kureha soil (Kureha Chemical, Tokyo, Japan) in a growth chamber under a 16 h light/8 h dark cycle. The temperature and relative humidity in the chamber was  $22 \pm 2^{\circ}C$  and  $60 \pm 10\%$ , respectively. Water with Hyponex

solution (0.1%) was applied to the plants growing tray twice a week. Homozygous *coi1* seedlings were screened by luciferase activity (Ellis and Turner 2001). The solution containing 3 mM luciferin (Promega) with 0.01% Triton X-100 was used on detached leaves. The plants were treated with 10  $\mu M$  MeJA for 24 h before using luciferin solution. Homozygous *coi1* seedlings leaves did not show luciferase expression to MeJA.

### Analysis of stomatal apertures

Stomatal apertures were measured according to the method of (Munemasa et al. 2007). Excised rosette leaves of 5- to 6-week-old plants were floated on stomata assay solution containing 5 mM KCl, 50  $\mu M$   $CaCl_2$  and 10 mM Mes-Tris (pH 6.15) under light for 2 h incubation and then ABA, MeJA and  $CaCl_2$  were added to the preincubated leaves. After 2 h incubation, stomatal apertures were measured after the leaf was blended for 25 s and the epidermal tissues were collected with nylon mesh. Stomatal apertures were observed under a microscope (Inverted Microscope 1X71–22TPH; Olympus, Japan).

### Measurement of $pH_{cyt}$

A pH-sensitive fluorescent dye, BCECF-AM, used to analyze cytosolic pH ( $pH_{cyt}$ ) in guard cells treated with ABA, MeJA, or  $CaCl_2$  as described previously (Suhita et al. 2004) with a slight modification. Four or five leaf epidermis strips were isolated from leaves of 5- to 6-week-old plants with a commercial blender. The collected epidermal strips were incubated for 3 h in light containing 50 mM KCl and 10 mM MES-KOH (pH 6.5). After this incubation, BCECF-AM was added as indicated to a final concentration of 20  $\mu M$  from a stock solution in dimethylsulfoxide and then epidermal tissues were incubated for 30 min in the dark at room temperature to load the dye. Then the tissues were rinsed several times with incubation buffer in order to remove excess dye. The dye-loaded epidermal tissues were treated for 20 min with 10  $\mu M$  ABA, 10  $\mu M$  MeJA or 2.5 mM  $CaCl_2$ . Ethanol (0.1%) for ABA and MeJA treatment and distilled water for  $Ca^{2+}$  treatment was used as solvent control. Fluorescence was quantified using a fluorescence microscope with the following settings: excitation 480 nm and emission 535 nm. AQUA COSMOS software (Hamamatsu Photonics, Hamamatsu, Japan.) was used for image analyses. Each datum was obtained from at least 50 guard cells.

### Measurement of $[Ca^{2+}]_{cyt}$

Rosette leaves of Arabidopsis YC3.6-expressing plants were used to examine  $[Ca^{2+}]_{cyt}$  oscillations in guard cells as described (Islam et al. 2010). The abaxial side of the excised leaf was gently mounted on a glass slide by using a medical adhesive, followed by removal of the adaxial epidermis and the mesophyll tissue with a razor blade in order to keep intact the lower epidermis on the slide. The mounted abaxial epidermal peel was kept in an incubation solution containing 5 mM KCl, 50  $\mu M$   $CaCl_2$  and 10 mM MES-Tris (pH 6.15) under light for 2 h at  $22^{\circ}C$ . The turgid guard cells were considered for ratiometric  $[Ca^{2+}]_{cyt}$  measurement. Then, guard cells were treated with the



incubation solution supplemented with 2.5 mM Ca<sup>2+</sup> with a peristaltic pump after 5 min from the start of measurement. Observation of YC3.6 was done by dual-emission ratio imaging using 440DF20 excitation filter, 445DRLP dichroic mirror and two emission filters 480DF30 for CFP and 535DF25 for YFP. The CFP and YFP fluorescence intensity of guard cells was imaged and analyzed using AQUA COSMOS software.

### Statistical analysis

Significance of differences between mean values was assessed by Student's *t*-test except [Ca<sup>2+</sup>]<sub>cyt</sub> oscillation data and significance of differences in [Ca<sup>2+</sup>]<sub>cyt</sub> oscillations between with butyrate and without butyrate treated cells induced by Ca<sup>2+</sup> ABA and MeJA, which were determined by chi-squared test. Differences at *P* < 0.05 were considered significant.

### Acknowledgments

This research was funded in part by a Grant-in-Aid for Young Scientists and Grants for Scientific Research on Priority Areas from the Ministry of Education, Culture, Sports, Science and Technology of Japan.

### References

- Alfonso, A., Cabado, A.G., Vieytes, M.R. and Botana, L.M. (2000) Calcium-pH crosstalks in rat mast cells: cytosolic alkalization, but not intracellular calcium release, is a sufficient signal for degranulation. *British J. Pharmacol.* 130: 1809–1816.
- Allan, A.C., Fricker, M.D., Ward, J.L., Beale, M.H. and Trewavas, A.J. (1994) Two transduction pathways mediate rapid effects of abscisic acid in *Commelina* guard cells. *Plant Cell* 6: 1319–1328.
- Allen, G.J., Chu, S.P., Harrington, C.L., Schumacher, K., Hoffmann, T., Tang, Y.Y., et al. (2001) A defined range of guard cell calcium oscillation parameters encodes stomatal movements. *Nature* 411: 1053–1057.
- Allen, G.J., Chu, S.P., Schumacher, K., Shimazaki, C.T., Vafeados, D., Kemper, A., et al. (2000) Alteration of stimulus-specific guard cell calcium oscillations and stomatal closing in *Arabidopsis det3* mutant. *Science* 289: 2338–2342.
- Allen, G.J., Kuchitsu, K., Chu, S.P., Murata, Y. and Schroeder, J.I. (1999a) *Arabidopsis abi1-1* and *abi2-1* phosphatase mutations reduce abscisic acid-induced cytoplasmic calcium rises in guard cells. *Plant Cell* 11: 1785–1798.
- Allen, G.J., Kwak, J.M., Chu, S.P., Llopis, J., Tsien, R.Y., Harper, J.F., et al. (1999b) Cameleon calcium indicator reports cytoplasmic calcium dynamics in *Arabidopsis* guard cells. *Plant J.* 19: 735–747.
- Allen, G.J., Murata, Y., Chu, S.P., Nafisi, M. and Schroeder, J.I. (2002) Hypersensitivity of abscisic acid-induced cytosolic calcium increases in the *Arabidopsis* farnesyltransferase mutant *era1-2*. *Plant Cell* 14: 1649–1662.
- Barkla, B.J., Vera-Estrella, R., Maldonado-Gama, M. and Pantoja, O. (1999) Abscisic acid induction of vacuolar H<sup>+</sup>-ATPase activity in *Mesembryanthemum crystallinum* is developmentally regulated. *Plant Physiol.* 120: 811–819.
- Blatt, M.R. and Armstrong, F. (1993) K<sup>+</sup> channels of stomatal guard cells: abscisic-acid-evoked control of the outward rectifier mediated by cytoplasmic pH. *Planta* 191: 330–341.
- Ellis, C. and Turner, J.G. (2001) The *Arabidopsis* mutant *cev1* has constitutively active jasmonate and ethylene signal pathways and enhanced resistance to pathogens. *Plant Cell* 13: 1025–1033.
- Evans, N.H. (2003) Modulation of guard cell plasma membrane potassium currents by methyl jasmonate. *Plant Physiol.* 131: 8–11.
- Gehring, C.A., Irving, H.R., McConchie, R. and Parish, R.W. (1997) Jasmonates induce intracellular alkalinization and closure of *Paphiopedilum* guard cells. *Ann. Bot.* 80: 485–489.
- Gilroy, S., Fricker, M.D., Read, N.D. and Trewavas, A.J. (1991) Role of calcium in signal transduction of *Commelina* guard cells. *Plant Cell* 3: 333–344.
- Gonugunta, V.K., Srivastava, N., Puli, M.R. and Raghavendra, A.S. (2008) Nitric oxide production occurs after alkalization during stomatal closure induced by abscisic acid. *Plant Cell Env.* 31: 1717–1724.
- Gosti, F., Beaudoin, N., Serizet, C., Webb, A.A.R., Vartanian, N. and Giraudat, J. (1999) ABI1 Protein phosphatase 2C is a negative regulator of abscisic acid signaling. *Plant cell* 11: 1897–1909.
- Grabov, A. and Blatt, M.R. (1997) Parallel control of the inward-rectifier K<sup>+</sup> channel by cytosolic free Ca<sup>2+</sup> and pH in *Vicia* guard cells. *Planta* 201: 84–95.
- Grabov, A. and Blatt, M.R. (1999) A steep dependence of inward-rectifying potassium channels on cytosolic free calcium concentration evoked by hyperpolarization in guard cell. *Plant Physiol.* 119: 277–287.
- Hetherington, A.M. and Woodward, F.I. (2003) The role of stomata in sensing and driving environmental change. *Nature* 424: 901–908.
- Iino, S., Hayashi, H., Saito, H., Tokuno, H. and Tomita, T. (1994) Effects of intracellular pH on calcium currents and intracellular calcium ions in the smooth muscle of rabbit portal vein. *Exp. Physiol.* 79: 669–680.
- Irving, H.R., Gehring, C.A. and Parish, R.W. (1992) Changes in cytosolic pH and calcium of guard cells precede stomatal movements. *Proc. Natl Acad. Sci. USA* 89: 1790–1794.
- Islam, M.M., Munemasa, S., Hossain, M.A., Nakamura, Y., Mori, I.C. and Murata, Y. (2010) Roles of AtTPC1, vacuolar two pore channel 1, in *Arabidopsis* stomatal closure. *Plant Cell Physiol.* 51: 302–311.
- Islam, M.M., Tani, C., Watanabe-Sugimoto, M., Uraji, M., Jahan, M.S., Masuda, C., et al. (2009) Myrosinases, TGG1 and TGG2, redundantly function in ABA and MeJA signaling in *Arabidopsis* guard cells. *Plant Cell Physiol.* 50: 1171–1175.
- Kwak, J.M., Mori, I.C., Pei, Z.M., Leonhardt, N., Torres, M.A., Dangl, J.L., et al. (2003) NADPH oxidase *AtrbohD* and *AtrbohF* genes function in ROS-dependent ABA signaling in *Arabidopsis*. *EMBO J.* 22: 2623–2633.
- Leipziger, J., MacGregor, G.G., Cooper, G.J., Xu, J., Hebert, S.C. and Giebisch, G. (2000) PKA site mutations of ROMK2 channels shift the pH dependence to more alkaline values. *Am. J. Physiol. Renal Physiol.* 279: F919–F926.
- Li, Y., Wang, G.-X., Xin, M., Yang, H.-M., Wu, X.-J. and Li, T. (2004) The parameters of guard cell calcium oscillation encodes stomatal oscillation and closure in *Vicia faba*. *Plant Sci.* 166: 415–421.
- Ma, Y., Szostkiewicz, I., Korte, A., Moes, D., Yang, Y., Christmann, A. and Grill, E. (2009) Regulators of PP2C phosphatase activity function as abscisic acid sensors. *Science* 324: 1064–1068.
- McAinsh, M.R., Brownlee, C. and Hetherington, A.M. (1990) Abscisic acid-induced elevation of cytosolic Ca<sup>2+</sup> precedes stomatal closure. *Nature* 343: 186–188.
- Melotto, M., Underwood, W., Koczan, J., Nomura, K. and He, S.Y. (2006) Plant stomata function in innate immunity against bacterial invasion. *Cell* 126: 969–980.

- Merlot, S., Gosti, F., Guerrier, D.L., Vavasseur, A. and Giraudat, J. (2001) The ABI1 and ABI2 protein phosphatases 2C act in a negative feedback regulatory loop of the abscisic acid signalling pathway. *Plant J.* 25: 295–303.
- Mori, I.C., Murata, Y., Yang, Y., Munemasa, S., Wang, Y.-F., Andreoli, S., et al. (2006) CDPKs CPK6 and CPK3 function in ABA regulation of guard cell S-type anion- and  $\text{Ca}^{2+}$ -permeable channels and stomatal closure. *PLoS Biol.* 4: 1749–1762.
- Munemasa, S., Oda, K., Watanabe-Sugimoto, M., Nakamura, Y., Shimoishi, Y. and Murata, Y. (2007) The *coronatine-insensitive 1* mutation reveals the hormonal signaling interaction between abscisic acid and methyl jasmonate in Arabidopsis guard cells. Specific impairment of ion channel activation and second messenger production. *Plant Physiol.* 143: 1398–1407.
- Murata, Y., Pei, Z.-M., Mori, I.C. and Schroeder, J. (2001) Abscisic acid activation of plasma membrane  $\text{Ca}^{2+}$  channels in guard cells requires cytosolic NAD(P)H and is differentially disrupted upstream and downstream of reactive oxygen species production in *abi1-1* and *abi2-1* protein phosphatase 2C mutants. *Plant Cell* 13: 2513–2523.
- Mustilli, A.-C., Merlot, S., Vavasseur, A., Fenzi, F. and Giraudat, J. (2002) Arabidopsis OST1 protein kinase mediates the regulation of stomatal aperture by abscisic acid and acts upstream of reactive oxygen species production. *Plant Cell* 14: 3089–3099.
- Park, S.-Y., Fung, P., Nishimura, N., Jensen, D.R., Fujii, H., Zhao, Y., et al. (2009) Abscisic acid inhibits type 2C protein phosphatases via the PYR/PYL family of START proteins. *Science* 324: 1068–1071.
- Pei, Z.-M., Murata, Y., Benning, G., Thomine, S., Klüsener, B., Allen, G.J., et al. (2000) Calcium channels activated by hydrogen peroxide mediate abscisic acid signalling in guard cells. *Nature* 406: 731–734.
- Saito, N., Munemasa, S., Nakamura, Y., Shimoishi, Y., Mori, I.C. and Murata, Y. (2008) Roles of RCN1, regulatory a subunit of protein phosphatase 2A, in methyl jasmonate signaling and signal crosstalk between methyl jasmonate and abscisic acid. *Plant Cell Physiol.* 49: 1396–1401.
- Schroeder, J.I., Allen, G.J., Hugouvieux, V., Kwak, J.M. and Waner, D. (2001) Guard cell signal transduction. *Annu. Rev. Plant Physiol. Plant Mol. Biol.* 52: 627–658.
- Schroeder, J.I. and Hagiwara, S. (1989) Cytosolic calcium regulates ion channels in the plasma membrane of *Vicia faba* guard cells. *Nature* 338: 427–430.
- Schwartz, A. (1985) Role of  $\text{Ca}^{2+}$  and EGTA on stomatal movements in *Commelina communis* L. *Plant Physiol.* 79: 1003–1005.
- Schwartz, A., Ilan, N. and Grantz, D.A. (1988) Calcium effects on stomatal movement in *Commelina communis* L. *Plant Physiol.* 87: 583–587.
- Stewart, A.K., Chernova, M.N., Kunes, Y.Z. and Alper, S.L. (2001) Regulation of AE2 anion exchanger by intracellular pH: critical regions of the  $\text{NH}_2$ -terminal cytoplasmic domain. *Am. J. Physiol. Cell Physiol.* 281: C1344–C1354.
- Suhita, D., Raghavendra, A.S., Kwak, J.M. and Vavasseur, A. (2004) Cytoplasmic alkalization precedes reactive oxygen species production during methyl jasmonate- and abscisic acid-induced stomatal closure. *Plant Physiol.* 134: 1536–1545.
- Vahisalu, T., Kollist, H., Wang, Y.-F., Nishimura, N., Chan, W.-Y., Valerio, G., et al. (2008) SLAC1 is required for plant guard cell S-type anion channel function in stomatal signalling. *Nature* 452: 487–492.
- Yan, J., Zhang, C., Gu, M., Bai, Z., Zhang, W., Qi, T., et al. (2009) The Arabidopsis CORONATINE INSENSITIVE1 protein is a jasmonate receptor. *Plant Cell* 21: 2220–2236.
- Young, J.J., Mehta, S., Israelsson, M., Godoski, J., Grill, E. and Schroeder, J.I. (2006)  $\text{CO}_2$  signaling in guard cells: calcium sensitivity response modulation, a  $\text{Ca}^{2+}$ -independent phase, and  $\text{CO}_2$  insensitivity of the *gca2* mutant. *Proc. Natl Acad. Sci. USA* 103: 7506–7511.
- Zhang, X., Dong, F.C., Gao, J.F. and Song, C.P. (2001) Hydrogen peroxide-induced changes in intracellular pH of guard cells precede stomatal closure. *Cell Res.* 11: 37–43.
